# Supplementary material for: Comparison of Pixel- and Object-Based Approaches in Phenology-Based Rubber Plantation Mapping in Fragmented Landscapes
Source: Preprints.org preprint supplement (doi:10.20944/preprints201608.0069.v1), 2016-08-06

## Tables

Table S1 Landsat mission

| Mission                                        | Instruments                         | Repeat cycle | Bands number | Equatorial crossing time | Launch            | End of imaging        |
|------------------------------------------------|-------------------------------------|--------------|--------------|--------------------------|-------------------|-----------------------|
| Landsat 1                                      | MSS <sup>1</sup> , RBV <sup>2</sup> | 18 days      | 4            | 9:30 a.m.±15 min         | July 23, 1972     | January 6, 1978       |
| Landsat 2                                      | MSS, RBV                            | 18 days      | 4            | 9:30 a.m.±15 min         | January 22, 1975  | February 25, 1982     |
| Landsat 3                                      | MSS, RBV                            | 18 days      | 4            | 9:30 a.m.±15 min         | March 5, 1978     | March 31, 1983        |
| Landsat 4                                      | MSS, TM                             | 16 days      | 7            | 9:45 a.m.±15 min         | July 16, 1982     | December 14, 1993     |
| Landsat 5                                      | MSS, TM                             | 16 days      | 7            | 9:45 a.m.±15 min         | March 1, 1984     | Ongoing               |
| Landsat 6                                      | ETM                                 | 16 days      | 8            | 10:00 a.m.±15 min        | October 5, 1993   | Failed to reach orbit |
| Landsat 7                                      | ETM+ <sup>3</sup>                   | 16 days      | 8            | 10:00 a.m.±15 min        | April 15, 1999    | Ongoing               |
| LDCM <sup>4</sup> (Landsat 8) OLI <sup>5</sup> | TIRS <sup>6</sup>                   | 16 days      | 11           | 10:00 a.m.±15 min        | February 11, 2013 | Ongoing               |

Notes: 1. MSS-Multispectral Scanner; 2. RBV – Return Beam Vidicon; 3 scan-line corrector failure on May 31, 2003. 4. LDCM-Landsat Data Continuity Mission; 5. OLI- Operational Land Imager; 6. TIR-Thermal Infrared Sensor.

**Fig. S1.** Photo taken on the same day in Menglun Township. A) Rubber trees still with green leaves. B) Rubber plantation already entered into late phase of leaf coloring and start of litterfall.

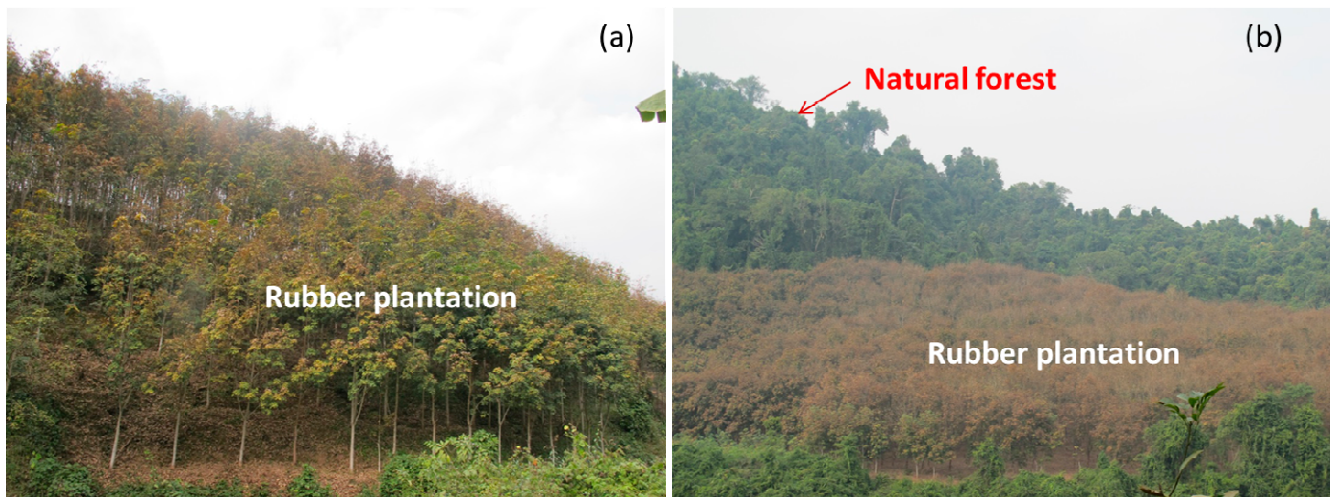

**Fig. S2.** Observed temporal changes of rubber plantation in Xishuangbanna by Google Earth with three satellite images (upper: November 6<sup>th</sup>, 2013; Middle: February 2<sup>nd</sup>, 2014; down: March 18<sup>th</sup>, 2014 ).

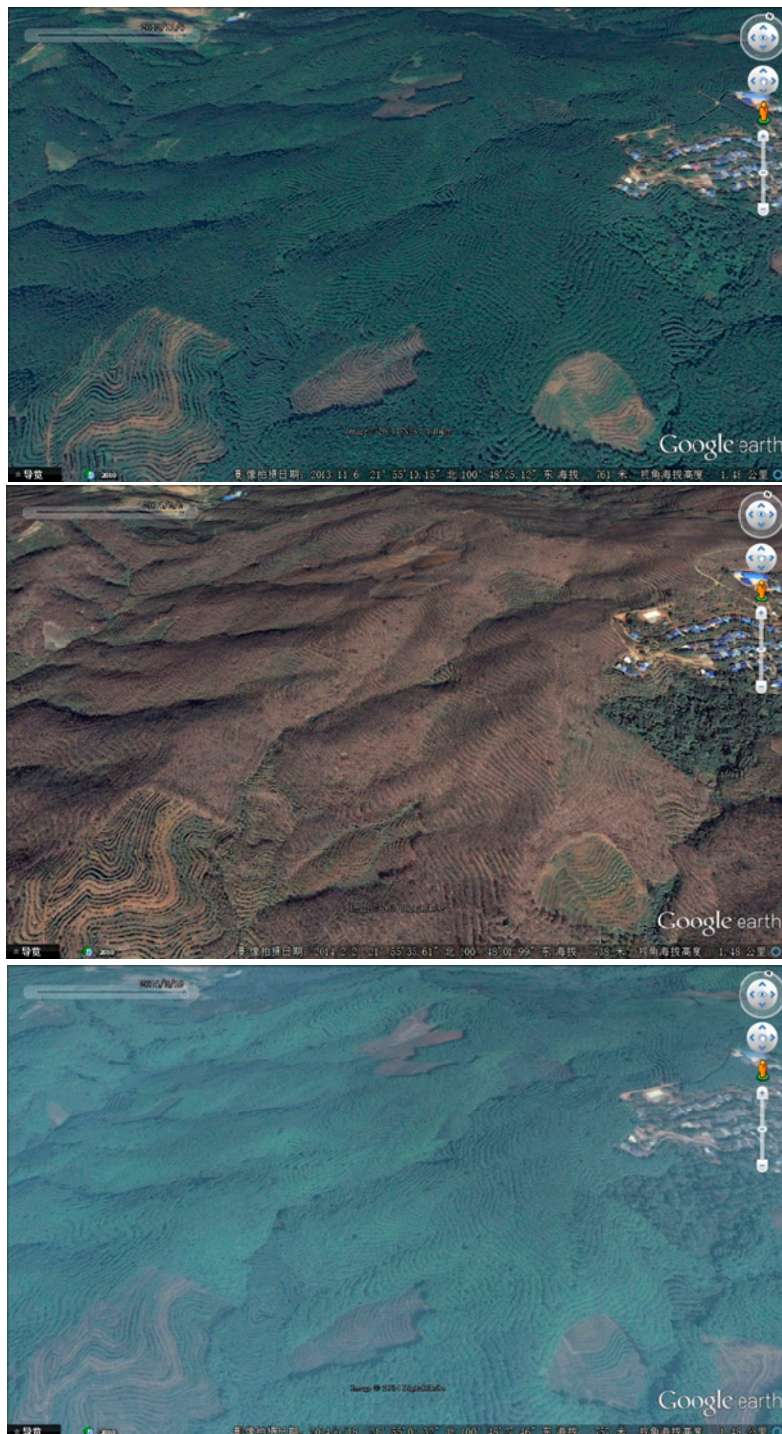

Supplement: Supplementary file 1 [file supplementary]
